# Supplementary material for: Computer-aided design and 3-dimensional artificial/convolutional neural network for digital partial dental crown synthesis and validation
Source: PubMed Central journal article supplement (PMC9884213; doi:10.1038/s41598-023-28442-1), 2023-01-28
Supplement: 41598_2023_28442_MOESM1_ESM.pdf [file 41598_2023_28442_MOESM1_ESM.pdf]

# Computer-Aided Design and 3-Dimensional Artificial/Convolutional Neural Network for Digital Partial Dental Crown Synthesis and Validation

## SUPPLEMENTARY INFORMATION

### Table of Contents

|                                                                                                 |    |
|-------------------------------------------------------------------------------------------------|----|
| Phase 1: Virtual parameter evaluation outcomes for Intra-oral scanner and Laser scanner.....    | 2  |
| Phase 1: Color map of interpoint mismatches, as seen through Hausdorff’s Distance analyses..... | 3  |
| Phase 2: Operational commands for Workflow 1 ( <i>3-matics</i> ) .....                          | 5  |
| Phase 2: Virtual parameter evaluation outcomes for Inlay designs in Workflow 1 .....            | 7  |
| Phase 2: Virtual parameter evaluation outcomes for Onlay designs in Workflow 1.....             | 14 |
| Phase 2: Operational commands for Workflow 2 ( <i>Meshmixer</i> ) .....                         | 21 |
| Phase 2: Virtual parameter evaluation outcomes for Inlay designs in Workflow 2 .....            | 23 |
| Phase 2: Virtual parameter evaluation outcomes for Onlay designs in Workflow 2.....             | 30 |
| Phase 3: 3-dimensional convolutional neural network sensitivity and specificity .....           | 37 |
| Supplementary Figures .....                                                                     | 38 |
| Supplementary Tables .....                                                                      | 45 |

## Phase 1: Virtual parameter evaluation outcomes for Intra-oral scanner and Laser scanner

### 1. Mesh Surface Area

| Specimen | Intra-oral Scanner | Laser Scanner |
|----------|--------------------|---------------|
| 1        | 327.600525         | 342.248627    |
| 2        | 419.827972         | 393.203491    |
| 3        | 234.528732         | 231.195862    |
| 4        | 342.962128         | 362.116333    |
| 5        | 286.561554         | 293.953369    |
| 6        | 219.107132         | 208.216751    |

### 2. Virtual Volume

| Specimen | Intra-oral Scanner | Laser Scanner |
|----------|--------------------|---------------|
| 1        | 400.696655         | 363.118805    |
| 2        | 510.206818         | 453.532990    |
| 3        | 254.498840         | 231.579453    |
| 4        | 374.789368         | 395.742828    |
| 5        | 302.636505         | 292.229523    |
| 6        | 220.162079         | 200.031662    |

### 3. Hausdorff's Distance

| Specimen | Intra-oral Scanner | Vs                       | Laser Scanner |
|----------|--------------------|--------------------------|---------------|
| 1        |                    | 0.097938 $\pm$ 0.162270  |               |
| 2        |                    | 0.163047 $\pm$ 0.230727  |               |
| 3        |                    | 0.102456 $\pm$ 0.141916  |               |
| 4        |                    | 0.041665 $\pm$ 0.192486  |               |
| 5        |                    | -0.025232 $\pm$ 0.180834 |               |
| 6        |                    | 0.105432 $\pm$ 0.149863  |               |

### 4. Dice Similarity Coefficient

| Specimen | Intra-oral Scanner | Vs       | Laser Scanner |
|----------|--------------------|----------|---------------|
| 1        |                    | 0.982488 |               |
| 2        |                    | 0.900511 |               |
| 3        |                    | 0.934798 |               |
| 4        |                    | 0.973759 |               |
| 5        |                    | 0.937422 |               |
| 6        |                    | 0.931543 |               |

# Phase 1: Color map of interpoint mismatches, as seen through Hausdorff's Distance analyses

| Specimen | Intraoral scan Vs Laser scan                                                        |                                                                                      |
|----------|-------------------------------------------------------------------------------------|--------------------------------------------------------------------------------------|
| 1        | 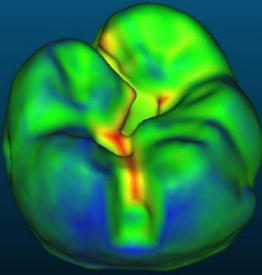   |    |
| 2        |   |   |
| 3        |  |  |
| 4        |  |  |

|   |  |                                                                                                                                                                      |  |
|---|--|----------------------------------------------------------------------------------------------------------------------------------------------------------------------|--|
| 5 |  | 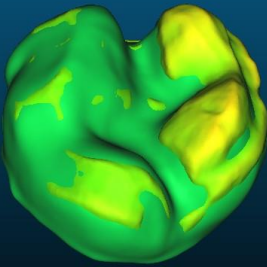  |  |
| 6 |  |   |  |

## Phase 2: Operational commands for Workflow 1 (3-matics)

### Inlay

- Open 3matics > *file* > *import part* > select template > *click ok*
- *Fix* > *auto fix* > select the imported template > *apply*
- *Analyze* > *create curvature analysis* > *apply*
- *Curve* > *create curve* > create a curve by plotting curve points around the defect > *close curve* > *select curve* > *apply*
- *Design* > *surface construction* > *select curve* > *apply*
- *Analysis list* > *template [Curvature Analysis]* > *delete* > *yes*
- *Design* > *hollow* > select hollow type as 'outside' > *apply*
- *Select the template and entities together* > *apply*
- *Finish* > *trim* > plot the trimming points around the reconstructed defect > *apply* > remove the extra areas around the defect > *fix* > *wrap* > *select the template and entities together* > *apply*
- *Select the imported template* > *delete* > *yes*
- *Trim* > plot the trimming points around the wrapped template > *apply*
- *File* > *import part* > select the model > *click ok*
- *Click on mouse right button to hide the 'imported model'* > *trim* > plot the trimming points to remove any extra portion from the template > *select wrapped template* > *apply* > *click on mouse right button to unhide the 'imported model'*
- *Finish* > *smooth edge* > select the template border > *apply*
- Select the wrapped template > *fix* > *wrap* > *apply* > *click on mouse right button to hide the 'imported model'* > *file* > *export* > *STL* > select the template wrapped as entity > select output directory > *apply*

### Onlay

- Open 3matics > *file* > *import part* > select both the block and onlay template > *click ok*
- *Click on mouse right button to hide the 'imported onlay template'* > select the block template > *click translate/ rotate* > align the block template within the defect > *click on mouse right button to unhide the 'imported onlay template'* > select both the block and onlay template as entity > *design* > *boolean union* > *apply*
- *Design* > *boolean subtraction* > Select both the block and onlay template as 'subtraction entity' > *apply*
- *Finish* > *trim* > plot the trimming points to remove any extra portion from the template > *apply* > *smooth edge* > *apply*
- *Fix* > *auto fix* > click the subtracted template > *apply*
- *Fix* > *wrap* > *apply*

- *File > import part > select the model > click ok*
- *Select the subtracted without wrapped template > delete > yes*
- *Select the subtracted wrapped template > trim > plot the trimming points to remove any extra portion from the onlay template > apply*
- *Click smooth edge > select the uneven borders as entity > apply*
- *File > export > STL > select the subtracted wrapped onlay template as entity > select output directory > apply*
- *Open Meshmixer > import the subtracted wrapped onlay template > analysis > inspector > auto repair all > done*
- *Edit > make solid > accurate > update > accept > click on mouse right button to delete the unsolid STL template file*
- *Sculpt > select the robust smooth brush tool to smooth out the uneven portion from the reconstructed onlay template*
- *export as STL format*

## Phase 2: Virtual parameter evaluation outcomes for Inlay designs in Workflow 1

### 1. Mesh Surface Area

| <b>Samples</b> | <b>Operator 1</b> | <b>Operator 2</b> |
|----------------|-------------------|-------------------|
| 1              | 186.512756        | 144.316422        |
| 2              | 140.311783        | 130.574417        |
| 3              | 140.617798        | 141.272156        |
| 4              | 188.360504        | 149.632202        |
| 5              | 176.387329        | 147.777008        |
| 6              | 200.940720        | 169.872528        |
| 7              | 201.436844        | 165.147079        |
| 8              | 196.707825        | 169.939682        |
| 9              | 145.364410        | 159.147202        |
| 10             | 174.906113        | 153.988525        |
| 11             | 52.135353         | 66.567986         |
| 12             | 56.126816         | 70.996414         |
| 13             | 53.823254         | 71.575768         |
| 14             | 50.548229         | 73.959114         |
| 15             | 62.782219         | -----             |

### 2. Virtual Volume

| <b>Samples</b> | <b>Operator 1</b> | <b>Operator 2</b> |
|----------------|-------------------|-------------------|
| 1              | 43.007740         | 40.222443         |
| 2              | 42.361702         | 44.959412         |
| 3              | 41.420044         | 45.908550         |
| 4              | 46.427631         | 46.056927         |
| 5              | 48.877945         | 44.704880         |
| 6              | 55.985210         | 50.303127         |
| 7              | 51.113541         | 55.757034         |
| 8              | 43.040730         | 49.315315         |
| 9              | 41.912964         | 45.974125         |
| 10             | 41.551579         | 42.975426         |
| 11             | 20.546768         | 19.775017         |
| 12             | 19.248747         | 20.511940         |
| 13             | 19.606424         | 20.112736         |
| 14             | 19.690113         | 21.693691         |
| 15             | 21.406635         | -----             |

### 3. Hausdorff's Distance

| Samples | Operator 1          | Operator 2          |
|---------|---------------------|---------------------|
| 1       | -0.099713 ±0.582039 | -0.143359 ±0.594401 |
| 2       | -0.154024 ±0.607225 | -0.174311 ±0.619415 |
| 3       | -0.162578 ±0.596869 | -0.178337 ±0.603924 |
| 4       | -0.103928 ±0.572541 | -0.167632 ±0.598728 |
| 5       | -0.122722 ±0.592649 | -0.156820 ±0.611431 |
| 6       | -0.270936 ±0.633483 | -0.321239 ±0.628782 |
| 7       | -0.279524 ±0.619985 | -0.265048 ±0.414909 |
| 8       | -0.281080 ±0.569685 | -0.339844 ±0.581191 |
| 9       | -0.398268 ±0.576353 | -0.359690 ±0.566294 |
| 10      | -0.326523 ±0.553245 | -0.355042 ±0.551709 |
| 11      | -0.284103 ±0.547951 | -0.216453 ±0.523173 |
| 12      | -0.275818 ±0.544664 | -0.209127 ±0.539585 |
| 13      | -0.284476 ±0.543860 | -0.205154 ±0.526702 |
| 14      | -0.308967 ±0.538112 | -0.188476 ±0.541088 |
| 15      | -0.257934 ±0.527669 | -----               |

- a) Comparison made against virtually scanned and conventionally made Inlays
- b) Hausdorff's distance measured with onlays attached to the samples, to mitigate oversampling influenced inconsistencies



#### 4. Color map of Hausdorff's distance

| Specimen | Operator 1 | Operator 2 |
|----------|------------|------------|
| 1        |            |            |
| 2        |            |            |
| 3        |            |            |
| 4        |            |            |

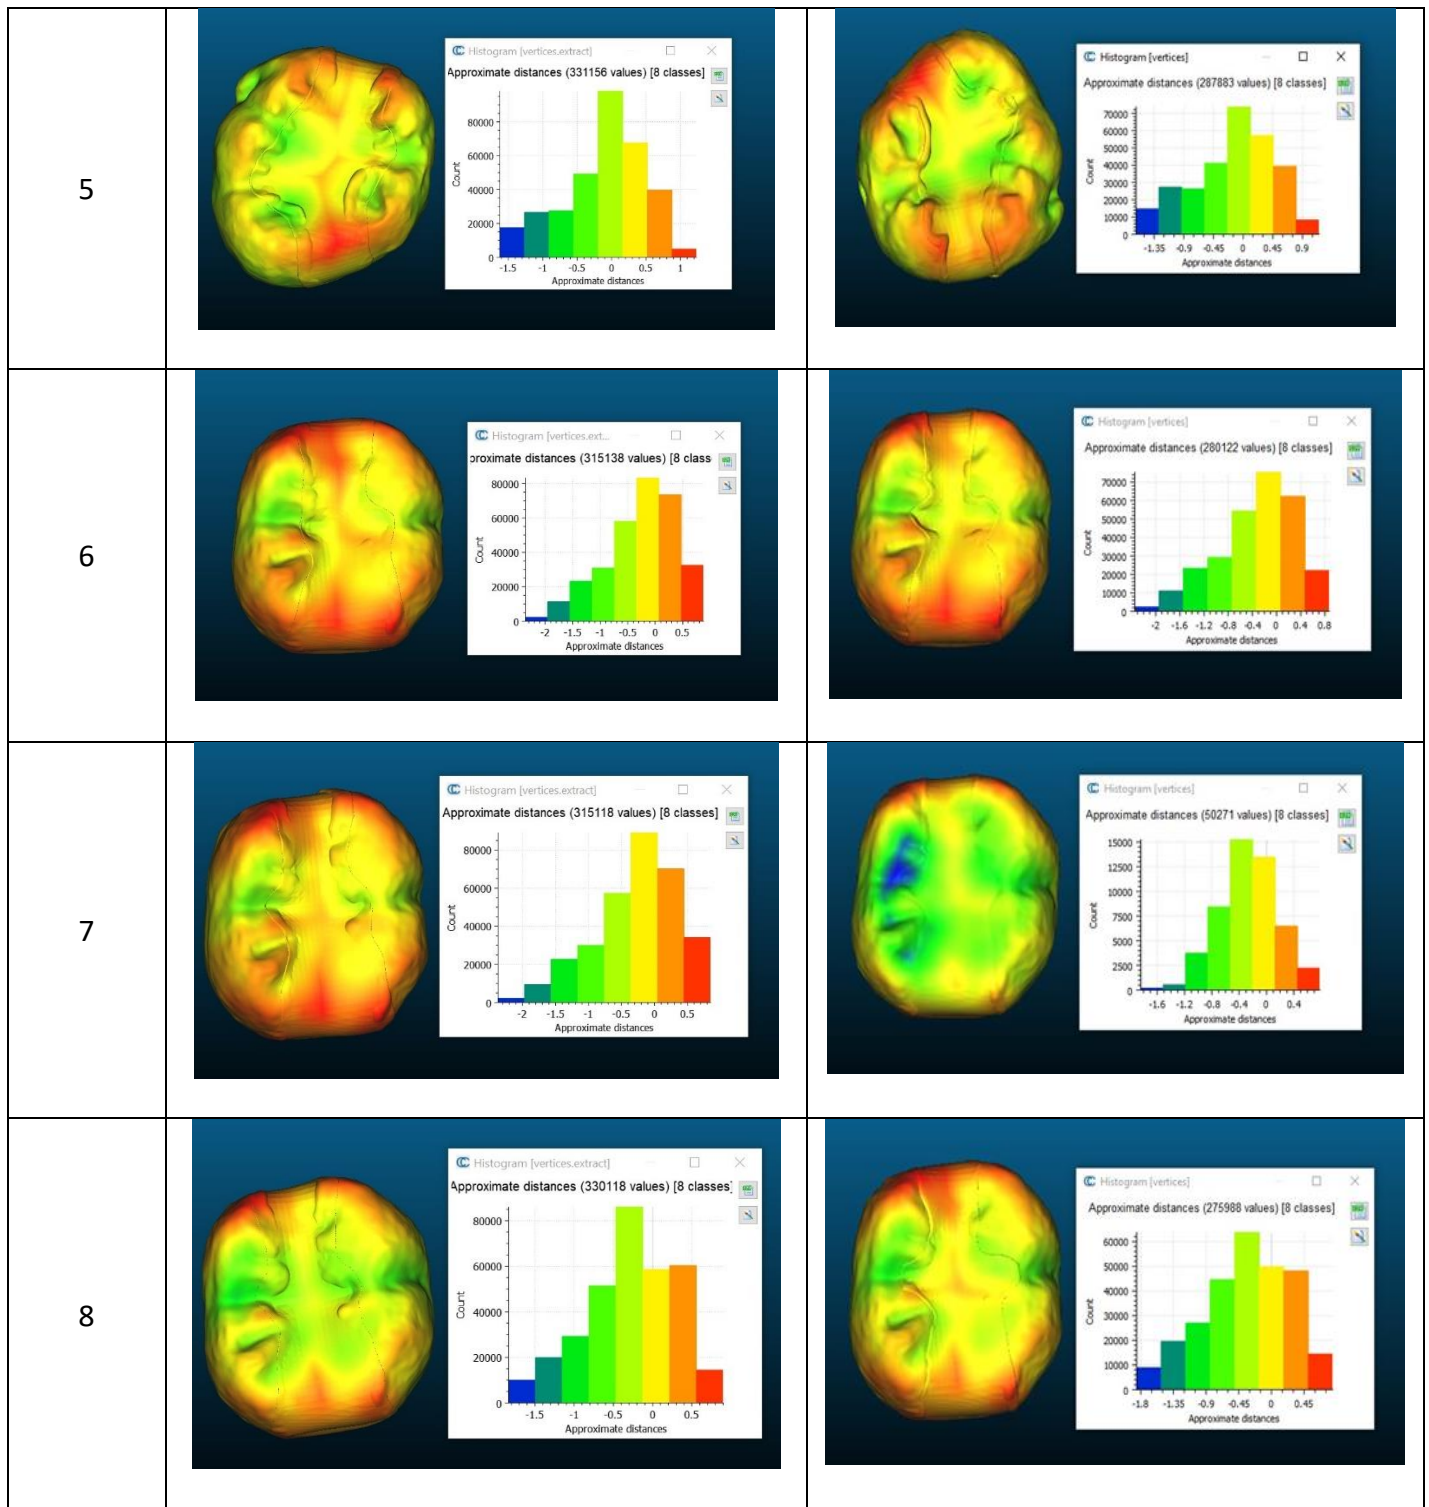

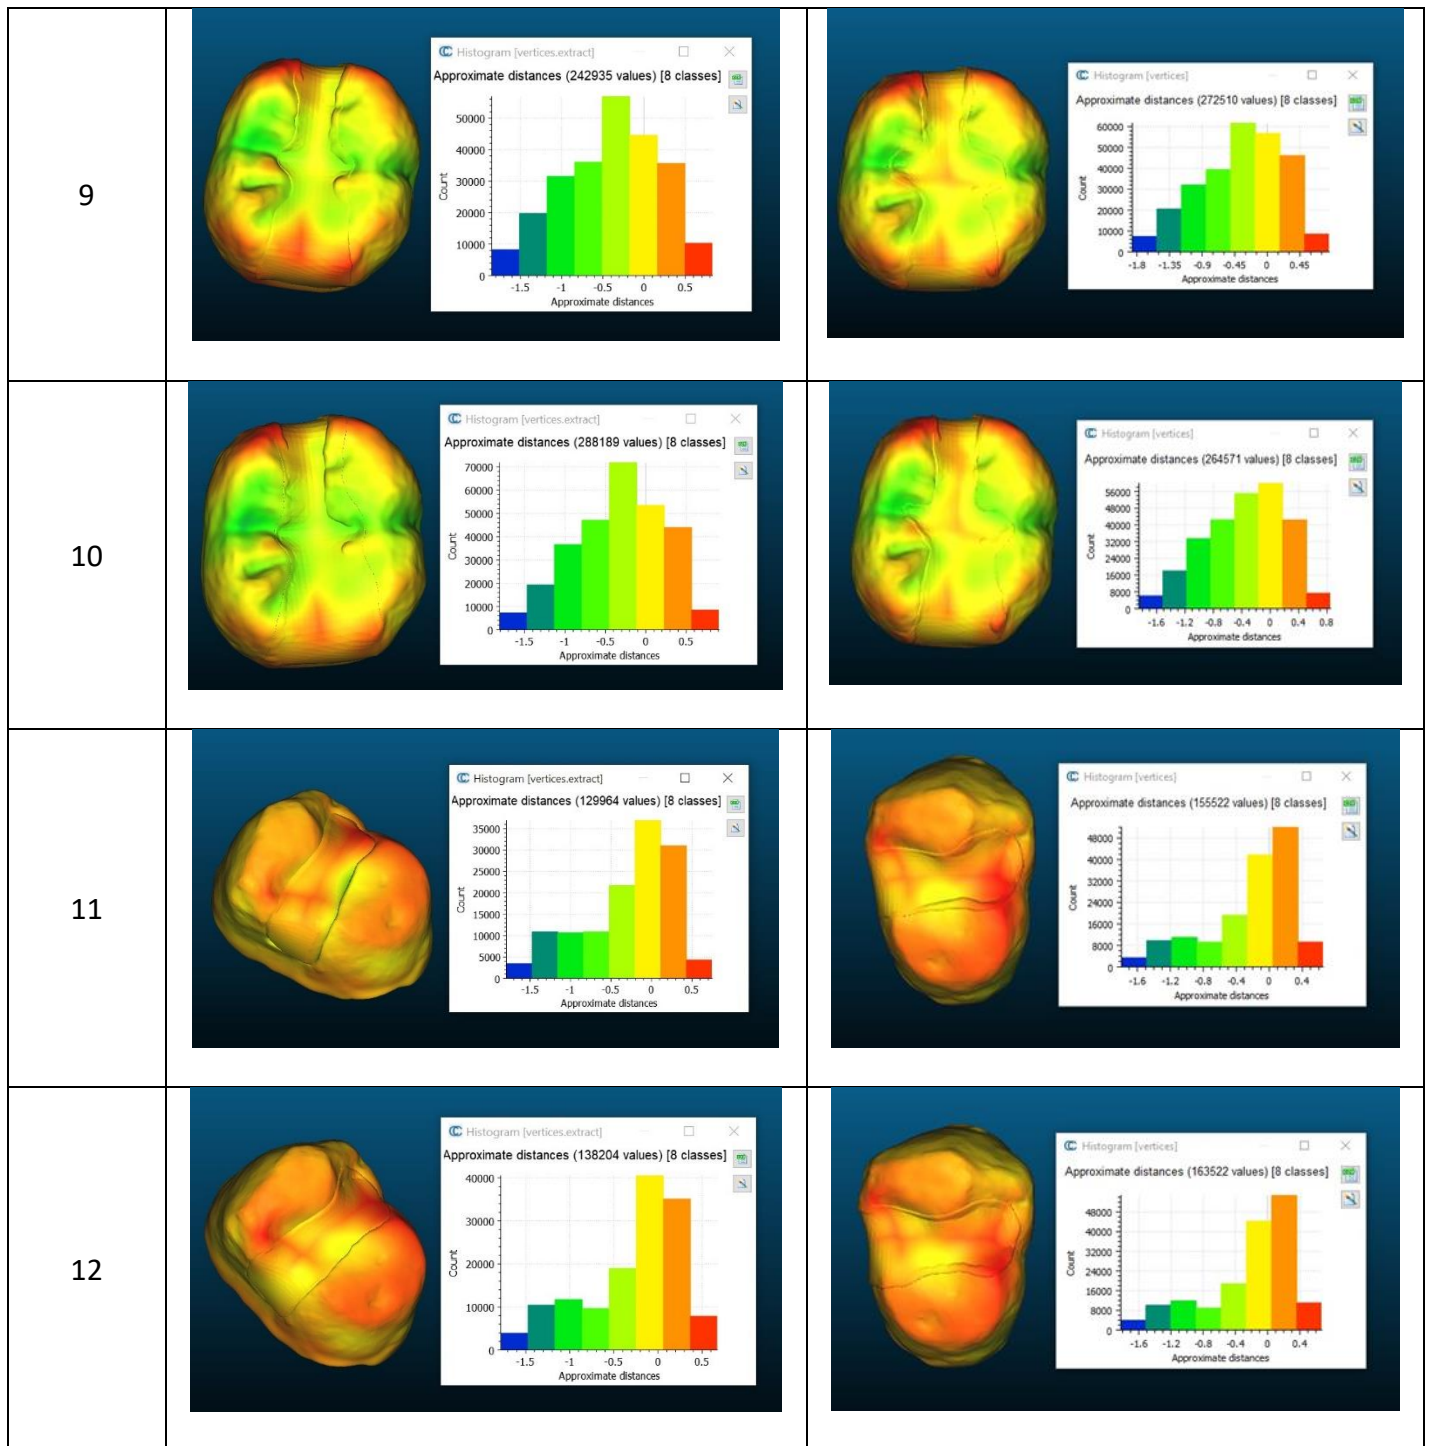

|    |  |              |
|----|--|--------------|
| 13 |  |              |
| 14 |  |              |
| 15 |  | <p>-----</p> |

## 5. Dice Similarity Coefficient

| Samples | Operator 1 | Operator 2 |
|---------|------------|------------|
| 1       | 0.882399   | 0.882935   |
| 2       | 0.885365   | 0.880513   |
| 3       | 0.879976   | 0.878344   |
| 4       | 0.873307   | 0.875692   |
| 5       | 0.878770   | 0.871556   |
| 6       | 0.810718   | 0.810537   |
| 7       | 0.811733   | 0.859077   |
| 8       | 0.823478   | 0.821768   |
| 9       | 0.819397   | 0.821604   |
| 10      | 0.823404   | 0.823241   |
| 11      | 0.899681   | 0.899018   |
| 12      | 0.896448   | 0.899380   |
| 13      | 0.897757   | 0.897433   |
| 14      | 0.892376   | 0.896851   |
| 15      | 0.891767   | -----      |

- a) Comparison made against virtually scanned and conventionally made Inlays
- b) Hausdorff's distance measured with onlays attached to the samples, to mitigate oversampling influenced inconsistencies

## Phase 2: Virtual parameter evaluation outcomes for Onlay designs in Workflow 1

### 1. Mesh Surface Area

| <b>Samples</b> | <b>Operator 1</b> | <b>Operator 2</b> |
|----------------|-------------------|-------------------|
| 1              | 416.101013        | 429.512756        |
| 2              | 429.105652        | 429.522369        |
| 3              | 427.752441        | 429.922821        |
| 4              | 422.481384        | 426.848480        |
| 5              | 431.557037        | 427.603333        |
| 6              | 306.987030        | 304.636597        |
| 7              | 298.155640        | 302.355591        |
| 8              | 291.782257        | 303.721588        |
| 9              | 291.741699        | 292.526520        |
| 10             | 292.376129        | 299.231842        |
| 11             | 126.483856        | 154.739441        |
| 12             | 123.609154        | 145.099319        |
| 13             | 144.313873        | 147.915985        |
| 14             | 144.852097        | 142.865311        |
| 15             | 141.997452        | 141.521683        |

### 2. Virtual Volume

| <b>Samples</b> | <b>Operator 1</b> | <b>Operator 2</b> |
|----------------|-------------------|-------------------|
| 1              | 266.334625        | 267.945709        |
| 2              | 279.134735        | 267.168030        |
| 3              | 280.999176        | 271.075562        |
| 4              | 272.959381        | 274.373901        |
| 5              | 271.747314        | 267.328400        |
| 6              | 168.008575        | 177.510956        |
| 7              | 147.456360        | 170.604324        |
| 8              | 145.857239        | 170.675095        |
| 9              | 143.538559        | 160.532059        |
| 10             | 143.447021        | 164.123215        |
| 11             | 47.163601         | 63.232418         |
| 12             | 43.129753         | 58.611378         |
| 13             | 66.357841         | 59.972904         |
| 14             | 66.397820         | 59.054153         |
| 15             | 62.193859         | 57.232430         |

### 3. Hausdorff's Distance

| Samples | Operator 1          | Operator 2          |
|---------|---------------------|---------------------|
| 1       | -0.354353 ±0.731484 | -0.343511 ±0.736753 |
| 2       | -0.337710 ±0.739113 | -0.244376 ±0.705227 |
| 3       | -0.341124 ±0.735458 | -0.331802 ±0.716778 |
| 4       | -0.350489 ±0.724673 | -0.328679 ±0.720684 |
| 5       | -0.338180 ±0.729628 | -0.339855 ±0.712887 |
| 6       | -0.094843 ±0.174660 | -0.318753 ±0.598738 |
| 7       | -0.219360 ±0.325744 | -0.333626 ±0.598629 |
| 8       | -0.239727 ±0.334353 | -0.333108 ±0.594664 |
| 9       | -0.234194 ±0.308532 | -0.339256 ±0.589377 |
| 10      | -0.247104 ±0.337820 | -0.104982 ±0.177127 |
| 11      | -0.219281 ±0.470172 | -0.197792 ±0.512537 |
| 12      | -0.234025 ±0.469331 | -0.217895 ±0.509120 |
| 13      | -0.247227 ±0.520365 | -0.195837 ±0.523231 |
| 14      | -0.235327 ±0.513909 | -0.236994 ±0.512880 |
| 15      | -0.224722 ±0.515644 | -0.223254 ±0.513661 |

- c) Comparison made against virtually scanned and conventionally made Onlays
- d) Hausdorff's distance measured with onlays attached to the samples, to mitigate oversampling influenced inconsistencies

#### 4. Color map of Hausdorff's distance

| Specimen | Operator 1                                               | Operator 2                                               |
|----------|----------------------------------------------------------|----------------------------------------------------------|
| 1        | <p>Approximate distances (105249 values) [8 classes]</p> | <p>Approximate distances (101382 values) [8 classes]</p> |
| 2        | <p>Approximate distances (104064 values) [8 classes]</p> | <p>Approximate distances (93148 values) [8 classes]</p>  |
| 3        | <p>Approximate distances (105316 values) [8 classes]</p> | <p>Approximate distances (108763 values) [8 classes]</p> |
| 4        | <p>Approximate distances (108617 values) [8 classes]</p> | <p>Approximate distances (109439 values) [8 classes]</p> |



|   |  |  |
|---|--|--|
| 5 |  |  |
| 6 |  |  |
| 7 |  |  |
| 8 |  |  |

|    |                                                                                     |                                                                                      |
|----|-------------------------------------------------------------------------------------|--------------------------------------------------------------------------------------|
| 9  | 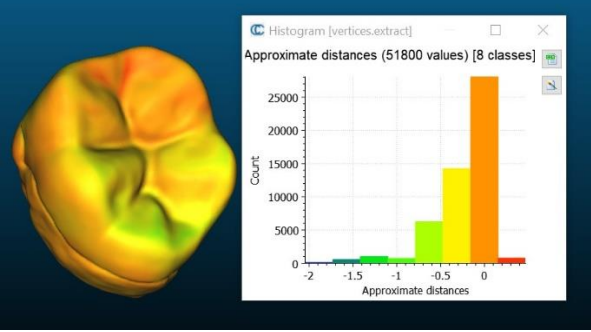   |    |
| 10 |    |    |
| 11 |   |   |
| 12 |  |  |

|    |                                                                                    |                                                                                     |
|----|------------------------------------------------------------------------------------|-------------------------------------------------------------------------------------|
| 13 | 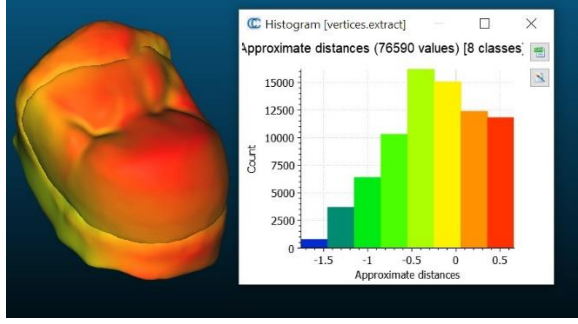  |   |
| 14 |   |   |
| 15 |  |  |

## 5. Dice Similarity Coefficient

| Samples | Operator 1 | Operator 2 |
|---------|------------|------------|
| 1       | 0.836770   | 0.818140   |
| 2       | 0.828649   | 0.833628   |
| 3       | 0.827020   | 0.829545   |
| 4       | 0.834012   | 0.824578   |
| 5       | 0.829519   | 0.818872   |
| 6       | 0.943911   | 0.853179   |
| 7       | 0.930426   | 0.842947   |
| 8       | 0.923915   | 0.847213   |
| 9       | 0.921245   | 0.841204   |
| 10      | 0.921626   | 0.940321   |
| 11      | 0.828881   | 0.855908   |
| 12      | 0.827747   | 0.837395   |
| 13      | 0.840568   | 0.841065   |
| 14      | 0.837845   | 0.846386   |
| 15      | 0.850172   | 0.841248   |

- a) Comparison made against virtually scanned and conventionally made Onlays
- b) Hausdorff's distance measured with onlays attached to the samples, to mitigate oversampling influenced inconsistencies

## Phase 2: Operational commands for Workflow 2 (*Meshmixer*)

### Inlay

- Open the STL file of tooth scan with Autodesk Meshmixer
- Select the block template > drag and drop to the Autodesk Meshmixer> *append* > *shift position: no.*
- *Edit* > *world frame* > manually adjust the block to the defect > *accept*
- *Ctrl* (select block template + inlay template) > *Boolean difference* > *accept* > *edit* > *make solid* > *solid type: accurate* > *accept*
- *Object browser: block template. stl* > *delete*
- *Select* (manually mark the excess peripherals) > *delete*
- *Analysis* > *inspector* > *auto repair all* > *done*
- *Edit* > *make solid* > *solid type: accurate* > *update* > *accept*
- Drag and drop the STL file of inlay tooth scan to Autodesk Meshmixer > *append* > *shift position: no.*
- *Object browser: block template. stl (solid) (solid)* > *sculpt* > *brushes* > *shrink smooth* (manually smoothen the sharp edges)
- *brushes* > *inflate* (manually make the grooves of occlusal surface according to the tooth anatomy) > *robust smooth* (manually smooth) > *shrink smooth* (manually smooth) > *drag* (manually cover the defects if any area remains uncovered) > *Flatten* (manually flatten the margins where needed)
- *export as STL format*

### Onlay

- Open the STL file of tooth scan with Autodesk Meshmixer
- *Select* the block template > drag and drop to the Autodesk Meshmixer> *append* > *shift position: no.*
- *Edit* > *world frame* > manually adjust the block to the defect > *accept*
- *Select* onlay template > drag and drop to Autodesk Meshmixer > *append* > *shift position: no*
- *Ctrl* (select block template + onlay template) > *combine* > *edit* > *make solid* > *solid type: accurate* > *update* > *accept*
- *Object browser: block template stl* > *delete*
- *Object browser: ctrl [select onlay. stl + block template. stl (solid)]* > *Boolean difference* > *accept*
- *Analysis* > *inspector* > *auto repair all* > *edit* > *make solid* > *solid type: accurate* > *update* > *accept*

- Drag and drop the STL file of tooth scan to Autodesk Meshmixer > *append* > *shift position: no*
- *Object browser: block template. stl (solid) (solid) > select* > manually mark the excess peripherals > *delete*
- *Analysis > inspector > auto repair all > edit > make solid > solid type: accurate > update > accept*
- *Object browser: block template. stl (solid) (solid) > delete*
- *Object browser: block template (solid) (solid) (solid) > sculpt > brushes > flatten* (manually flatten the edges) > *shrink smooth* (manually smoothen the irregularities) > *robust smooth*
- *Object browser: onlay. stl (set as target) > block template. stl (solid) (solid) (solid) > sculpt > brushes > shrink smooth* (manually smoothen the excesses)
- *Object browser: onlay. stl (hide object) > sculpt > brushes > robust smooth* (manually smooth the irregular edges) > show object (onlay. stl) > *sculpt > brushes > drag* (manually cover the defects if any area remains uncovered)
- *export as STL format*

## Phase 2: Virtual parameter evaluation outcomes for Inlay designs in Workflow 2

### 1. Mesh Surface Area

| <b>Samples</b> | <b>Operator 1</b> | <b>Operator 2</b> |
|----------------|-------------------|-------------------|
| 1              | 95.384743         | 95.599907         |
| 2              | 104.588898        | 99.280701         |
| 3              | 103.152351        | 100.028564        |
| 4              | 105.331421        | 105.556633        |
| 5              | 105.090652        | 103.551941        |
| 6              | 114.674393        | 115.027374        |
| 7              | 109.005348        | 117.420898        |
| 8              | 109.116737        | 113.890030        |
| 9              | 106.831161        | 101.972191        |
| 10             | 106.431557        | 105.669388        |
| 11             | 51.391506         | 49.402653         |
| 12             | 50.423153         | 47.921539         |
| 13             | 50.897137         | 49.071480         |
| 14             | 51.858192         | 49.311707         |
| 15             | 56.229607         | 55.402107         |

### 2. Virtual Volume

| <b>Samples</b> | <b>Operator 1</b> | <b>Operator 2</b> |
|----------------|-------------------|-------------------|
| 1              | 38.156460         | 37.548470         |
| 2              | 40.243011         | 37.432858         |
| 3              | 43.555904         | 39.762962         |
| 4              | 42.160534         | 41.008389         |
| 5              | 46.490730         | 41.531620         |
| 6              | 48.814018         | 48.373783         |
| 7              | 43.999088         | 49.986832         |
| 8              | 42.375202         | 43.157249         |
| 9              | 39.120743         | 35.455460         |
| 10             | 36.668194         | 36.054703         |
| 11             | 18.828712         | 19.843365         |
| 12             | 19.356865         | 18.982983         |
| 13             | 18.828136         | 17.542906         |
| 14             | 17.999161         | 17.097883         |
| 15             | 21.252043         | 19.983858         |

### 3. Hausdorff's Distance

| Samples | Operator 1          | Operator 2          |
|---------|---------------------|---------------------|
| 1       | -0.046352 ±0.208370 | -0.191179 ±0.521602 |
| 2       | -0.049777 ±0.210664 | -0.185989 ±0.519171 |
| 3       | -0.041633 ±0.214145 | -0.192801 ±0.516250 |
| 4       | -0.055994 ±0.216792 | -0.187743 ±0.524317 |
| 5       | -0.045923 ±0.213023 | -0.194326 ±0.529987 |
| 6       | -0.301226 ±0.434545 | -0.402317 ±0.628927 |
| 7       | -0.305183 ±0.433800 | -0.382326 ±0.644880 |
| 8       | -0.298800 ±0.440940 | -0.370403 ±0.564651 |
| 9       | -0.305765 ±0.431150 | -0.411835 ±0.572923 |
| 10      | -0.310213 ±0.440414 | -0.411713 ±0.558276 |
| 11      | -0.077779 ±0.139746 | -0.312563 ±0.531053 |
| 12      | -0.081451 ±0.139149 | -0.337719 ±0.539888 |
| 13      | -0.080388 ±0.137801 | -0.327381 ±0.515654 |
| 14      | -0.088769 ±0.157490 | -0.308788 ±0.499512 |
| 15      | -0.080655 ±0.140072 | -0.270326 ±0.491395 |

- c) Comparison made against virtually scanned and conventionally made Inlays
- d) Hausdorff's distance measured with onlays attached to the samples, to mitigate oversampling influenced inconsistencies



#### 4. Color map of Hausdorff's distance

| Specimen | Operator 1                                                                          | Operator 2                                                                           |
|----------|-------------------------------------------------------------------------------------|--------------------------------------------------------------------------------------|
| 1        | 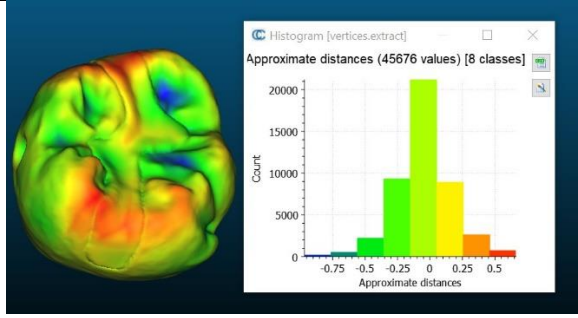   |    |
| 2        |    |    |
| 3        |   |   |
| 4        |  |  |

|   |                                                                                                                                             |                                                                                                                                              |
|---|---------------------------------------------------------------------------------------------------------------------------------------------|----------------------------------------------------------------------------------------------------------------------------------------------|
| 5 | 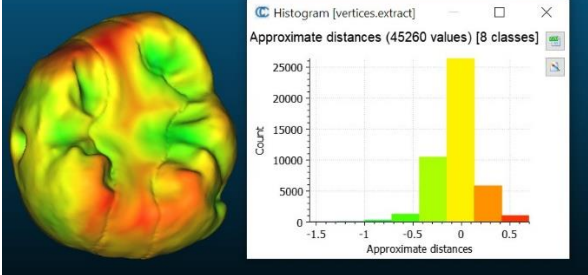 <p>Approximate distances (45260 values) [8 classes]</p>   |  <p>Approximate distances (86490 values) [8 classes]</p>   |
| 6 |  <p>Approximate distances (48667 values) [8 classes]</p>   |  <p>Approximate distances (81944 values) [8 classes]</p>   |
| 7 |  <p>Approximate distances (48255 values) [8 classes]</p>  |  <p>Approximate distances (79346 values) [8 classes]</p>  |
| 8 |  <p>Approximate distances (48637 values) [8 classes]</p> |  <p>Approximate distances (88481 values) [8 classes]</p> |

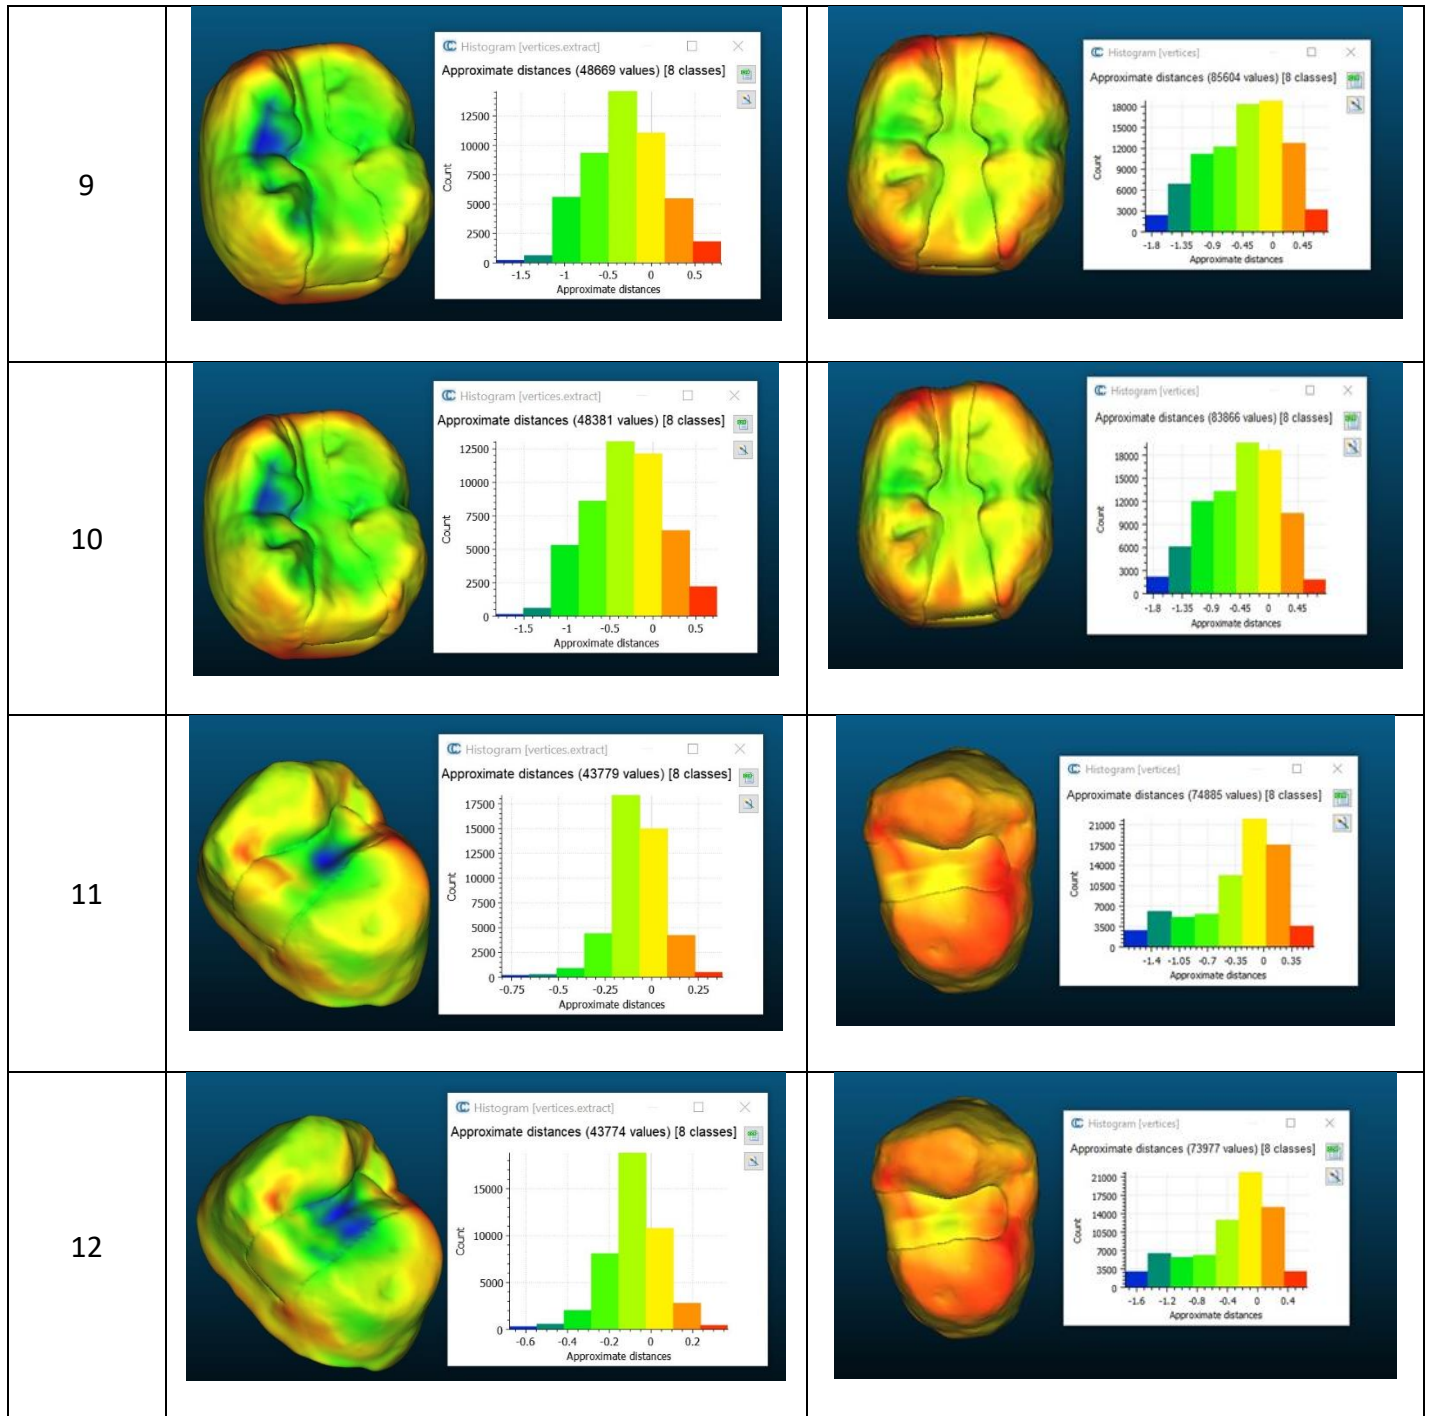

|    |                                                                                    |                                                                                     |
|----|------------------------------------------------------------------------------------|-------------------------------------------------------------------------------------|
| 13 | 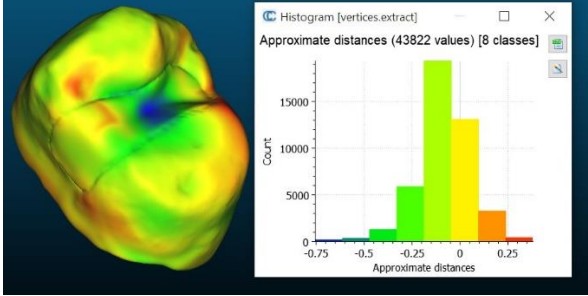  |   |
| 14 |   |   |
| 15 |  |  |

## 5. Dice Similarity Coefficient

| Samples | Operator 1 | Operator 2 |
|---------|------------|------------|
| 1       | 0.939905   | 0.856353   |
| 2       | 0.938907   | 0.856627   |
| 3       | 0.939486   | 0.861130   |
| 4       | 0.938441   | 0.859198   |
| 5       | 0.940409   | 0.855673   |
| 6       | 0.851543   | 0.795881   |
| 7       | 0.848306   | 0.798396   |
| 8       | 0.851321   | 0.807343   |
| 9       | 0.848255   | 0.813377   |
| 10      | 0.847301   | 0.809659   |
| 11      | 0.945688   | 0.885706   |
| 12      | 0.944627   | 0.887758   |
| 13      | 0.945454   | 0.886824   |
| 14      | 0.941094   | 0.887798   |
| 15      | 0.943548   | 0.885934   |

- e) Comparison made against virtually scanned and conventionally made Inlays
- f) Hausdorff's distance measured with onlays attached to the samples, to mitigate oversampling influenced inconsistencies

## Phase 2: Virtual parameter evaluation outcomes for Onlay designs in Workflow 2

### 1. Mesh Surface Area

| <b>Samples</b> | <b>Operator 1</b> | <b>Operator 2</b> |
|----------------|-------------------|-------------------|
| 1              | 426.928253        | 430.436798        |
| 2              | 424.066437        | 431.604492        |
| 3              | 424.579041        | 427.127106        |
| 4              | 428.598816        | 432.335907        |
| 5              | 430.906494        | 435.725677        |
| 6              | 307.510345        | 294.779083        |
| 7              | 307.273529        | 303.402130        |
| 8              | 314.357147        | 313.271332        |
| 9              | 311.901794        | 305.985962        |
| 10             | 314.920776        | 307.528015        |
| 11             | 147.455688        | 138.771866        |
| 12             | 150.773102        | 143.236542        |
| 13             | 149.348022        | 144.460999        |
| 14             | 152.624237        | 138.794815        |
| 15             | 151.248550        | 141.874084        |

### 2. Virtual Volume

| <b>Samples</b> | <b>Operator 1</b> | <b>Operator 2</b> |
|----------------|-------------------|-------------------|
| 1              | 272.618225        | 272.177826        |
| 2              | 270.235870        | 266.380890        |
| 3              | 275.402100        | 266.220123        |
| 4              | 273.465942        | 270.175659        |
| 5              | 272.020813        | 272.511047        |
| 6              | 171.640717        | 159.475891        |
| 7              | 170.571091        | 170.700424        |
| 8              | 174.787582        | 174.061813        |
| 9              | 171.496994        | 169.184479        |
| 10             | 173.452301        | 165.916962        |
| 11             | 63.030849         | 56.233894         |
| 12             | 65.805733         | 61.184933         |
| 13             | 63.259949         | 59.142876         |
| 14             | 65.927345         | 56.701118         |
| 15             | 66.081116         | 58.773804         |

### 3. Hausdorff's Distance

| Samples | Operator 1          | Operator 2          |
|---------|---------------------|---------------------|
| 1       | 0.030160 ±0.190322  | -0.338327 ±0.716818 |
| 2       | 0.026761 ±0.192148  | -0.430538 ±0.724948 |
| 3       | 0.030366 ±0.191116  | -0.347961 ±0.726917 |
| 4       | 0.030383 ±0.189651  | -0.338015 ±0.721700 |
| 5       | 0.025272 ±0.225857  | -0.332609 ±0.723064 |
| 6       | -0.083200 ±0.162333 | -0.119360 ±0.188511 |
| 7       | -0.082895 ±0.159217 | -0.328682 ±0.588457 |
| 8       | -0.066249 ±0.156153 | -0.073351 ±0.157500 |
| 9       | -0.075512 ±0.158511 | -0.319018 ±0.575704 |
| 10      | -0.065883 ±0.154818 | -0.322096 ±0.573796 |
| 11      | -0.072291 ±0.147974 | -0.200725 ±0.502298 |
| 12      | -0.056789 ±0.129332 | -0.206426 ±0.499225 |
| 13      | -0.062576 ±0.130747 | -0.217944 ±0.498508 |
| 14      | -0.058713 ±0.140052 | -0.221223 ±0.498606 |
| 15      | -0.057320 ±0.129853 | -0.229074 ±0.505443 |

- g) Comparison made against virtually scanned and conventionally made Onlays
- h) Hausdorff's distance measured with onlays attached to the samples, to mitigate oversampling influenced inconsistencies

#### 4. Color map of Hausdorff's distance

| Specimen | Operator 1                                                                          | Operator 2                                                                           |
|----------|-------------------------------------------------------------------------------------|--------------------------------------------------------------------------------------|
| 1        | 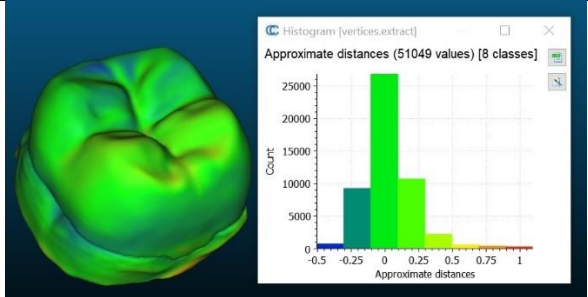   |    |
| 2        |    |    |
| 3        |  |  |
| 4        |  |  |



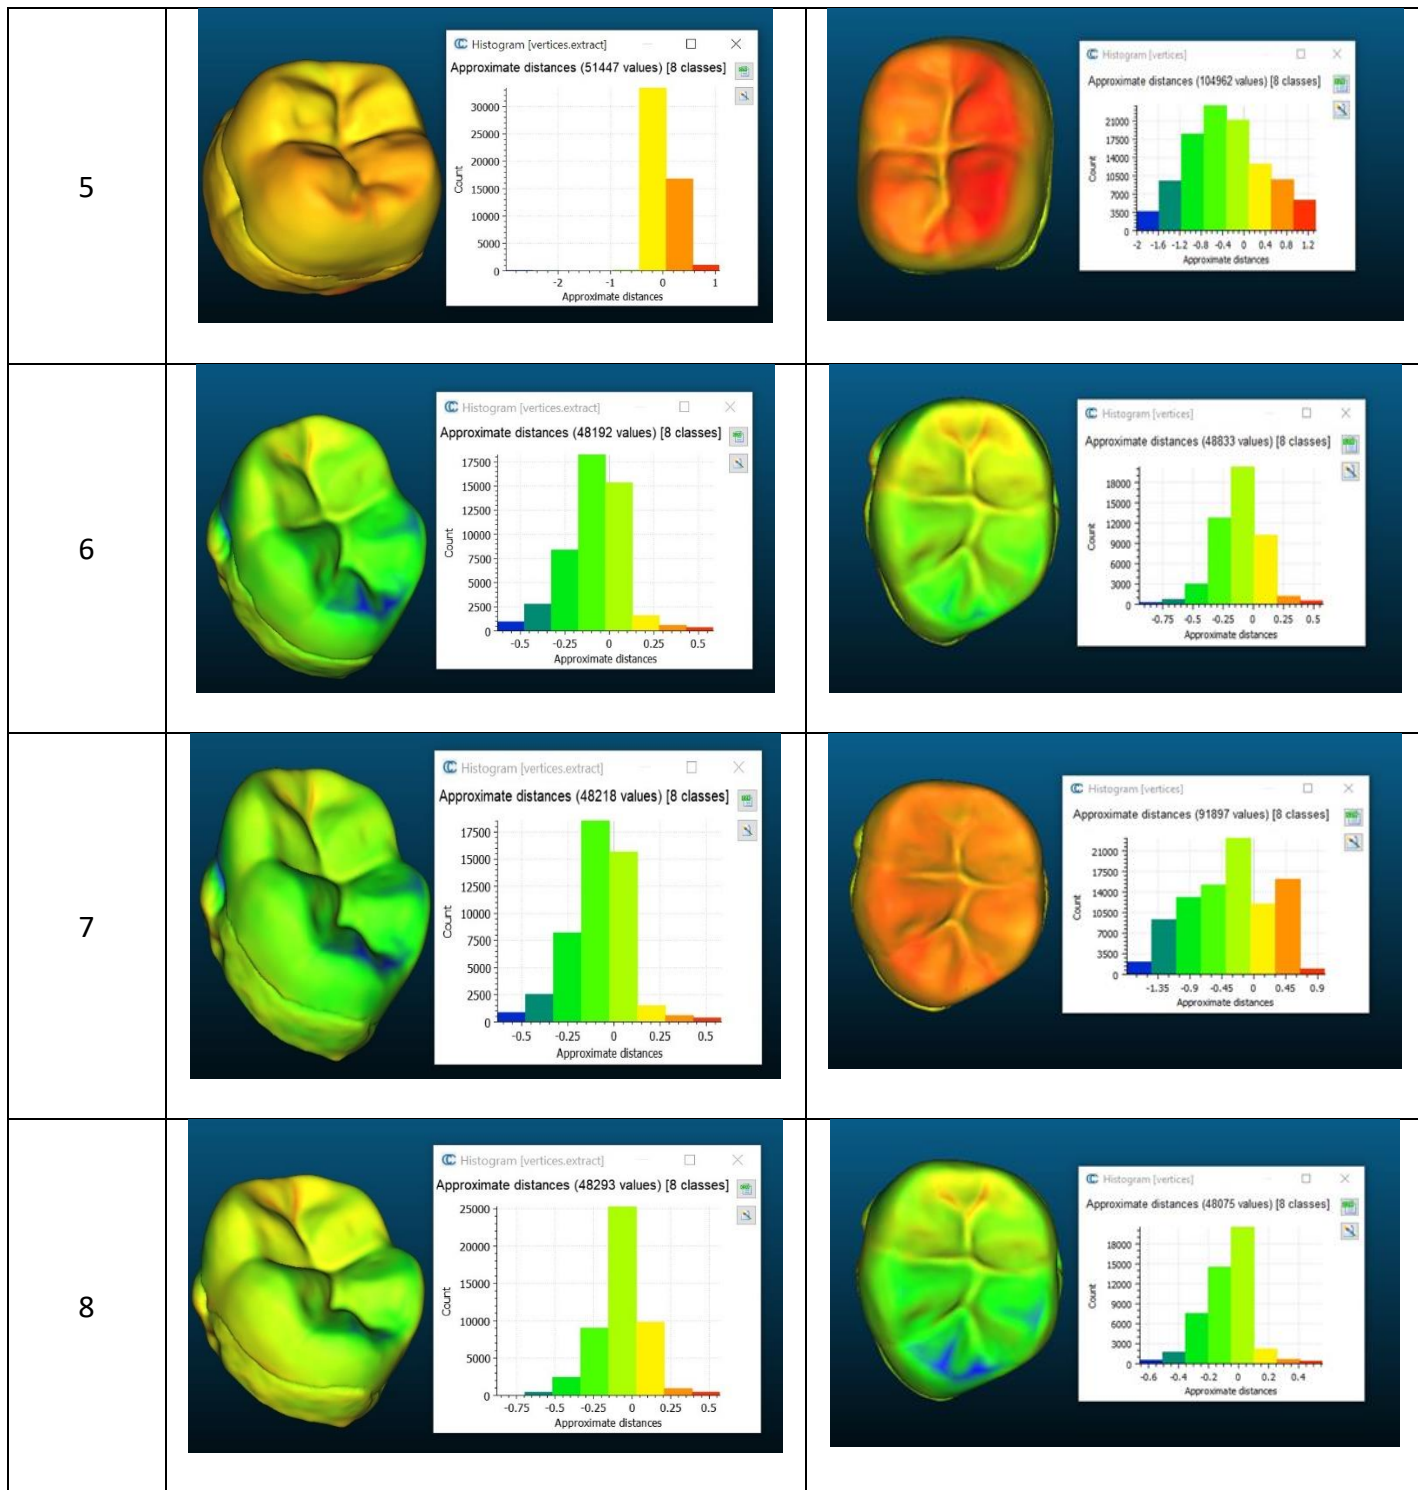

|    |  |  |
|----|--|--|
| 9  |  |  |
| 10 |  |  |
| 11 |  |  |
| 12 |  |  |

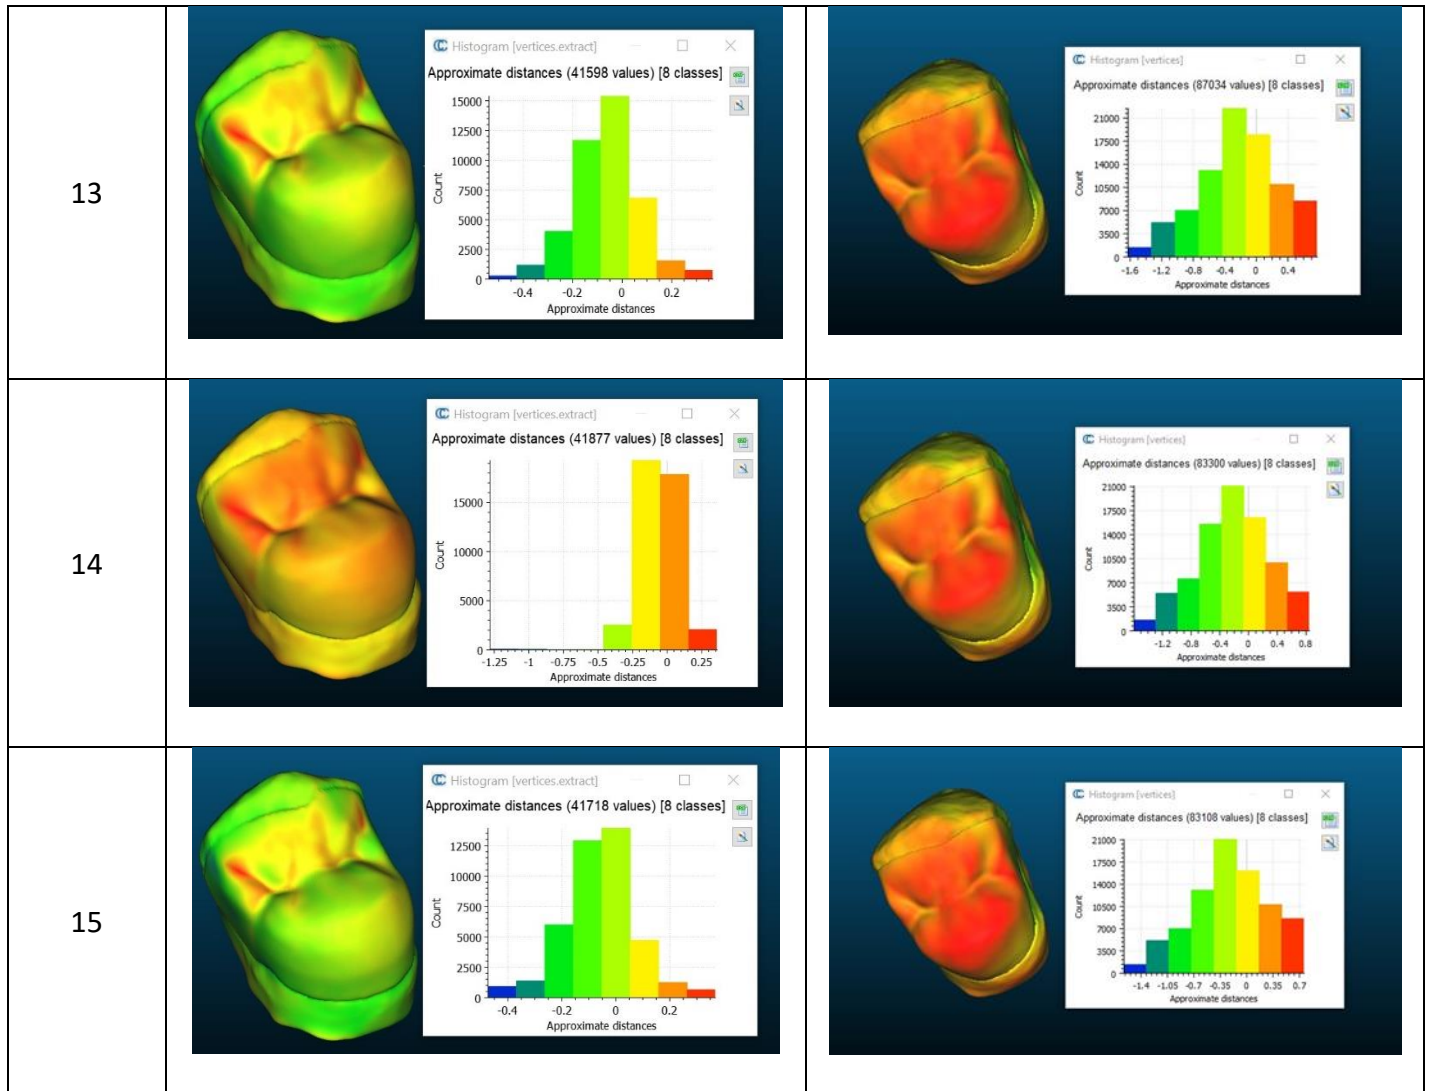

## 5. Dice Similarity Coefficient

| Samples | Operator 1 | Operator 2 |
|---------|------------|------------|
| 1       | 0.957661   | 0.829373   |
| 2       | 0.956816   | 0.816703   |
| 3       | 0.943675   | 0.822031   |
| 4       | 0.958078   | 0.817534   |
| 5       | 0.957369   | 0.814989   |
| 6       | 0.949892   | 0.938788   |
| 7       | 0.950585   | 0.840246   |
| 8       | 0.955312   | 0.952830   |
| 9       | 0.952704   | 0.844812   |
| 10      | 0.955262   | 0.842167   |
| 11      | 0.949337   | 0.844596   |
| 12      | 0.953480   | 0.852279   |
| 13      | 0.951866   | 0.855818   |
| 14      | 0.952832   | 0.847375   |
| 15      | 0.953343   | 0.850619   |

- c) Comparison made against virtually scanned and conventionally made Onlays
- d) Hausdorff's distance measured with onlays attached to the samples, to mitigate oversampling influenced inconsistencies

Phase 3: 3-dimensional convolutional neural network sensitivity and specificity

| Tooth Preparation Model |                 |               |                |               |                 |
|-------------------------|-----------------|---------------|----------------|---------------|-----------------|
| Validation File No.     | Predicted Label | Actual result | False Positive | True Positive | False Negatives |
|                         | Onlay           | Inlay         | 1              | 0             | 0               |
|                         | Onlay           | Inlay         | 1              | 0             | 0               |
|                         | Onlay           | Inlay         | 1              | 0             | 0               |
|                         | Onlay           | Inlay         | 1              | 0             | 0               |
|                         | Onlay           | Inlay         | 1              | 0             | 0               |
|                         | Onlay           | Onlay         | 0              | 1             | 0               |
|                         | Onlay           | Onlay         | 0              | 1             | 0               |
|                         | Onlay           | Onlay         | 0              | 1             | 0               |
|                         | Onlay           | Onlay         | 0              | 1             | 0               |
|                         | Onlay           | Onlay         | 0              | 1             | 0               |
| Prostheses Model        |                 |               |                |               |                 |
| Validation File No.     | Predicted Label | Actual result | False Positive | True Positive | False Negatives |
|                         | Onlay           | Inlay         | 1              | 0             | 0               |
|                         | Inlay           | Inlay         | 0              | 0             | 0               |
|                         | Inlay           | Inlay         | 0              | 0             | 0               |
|                         | Inlay           | Inlay         | 0              | 0             | 0               |
|                         | Inlay           | Inlay         | 0              | 0             | 0               |
|                         | Onlay           | Onlay         | 0              | 1             | 0               |
|                         | Onlay           | Onlay         | 0              | 1             | 0               |
|                         | Onlay           | Onlay         | 0              | 1             | 0               |
|                         | Onlay           | Onlay         | 0              | 1             | 0               |
|                         | Onlay           | Onlay         | 0              | 1             | 0               |

## Supplementary Figures

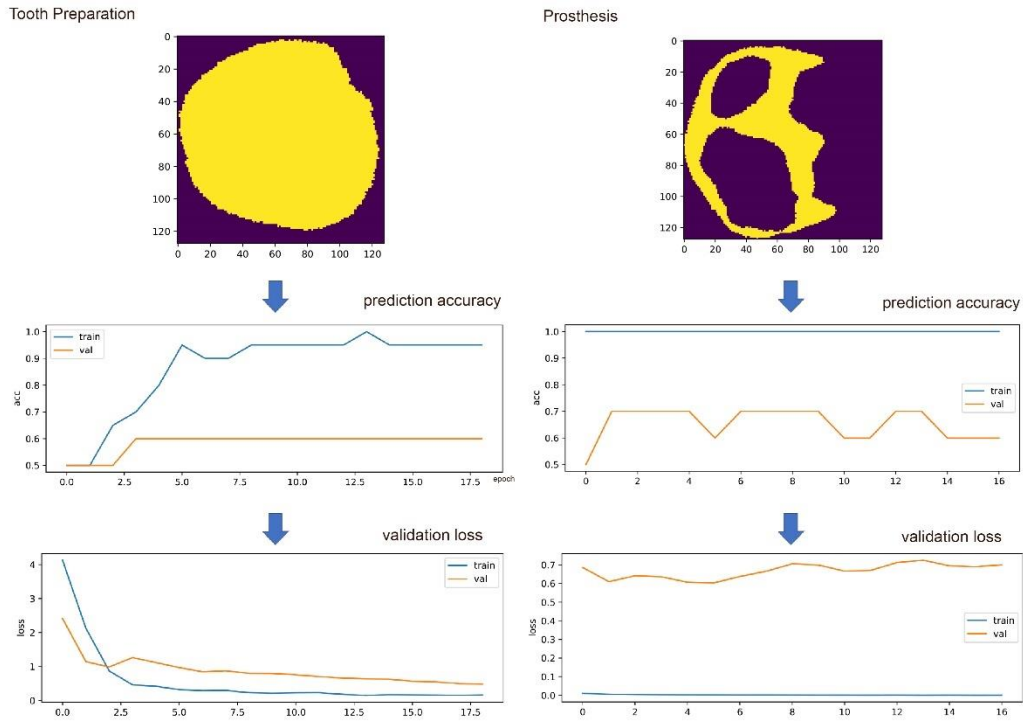

**Supplementary (S) Figure 1:** Graphical outcomes of prediction accuracy and validation loss for 3D models of tooth preparation (left) and corresponding prostheses (right)

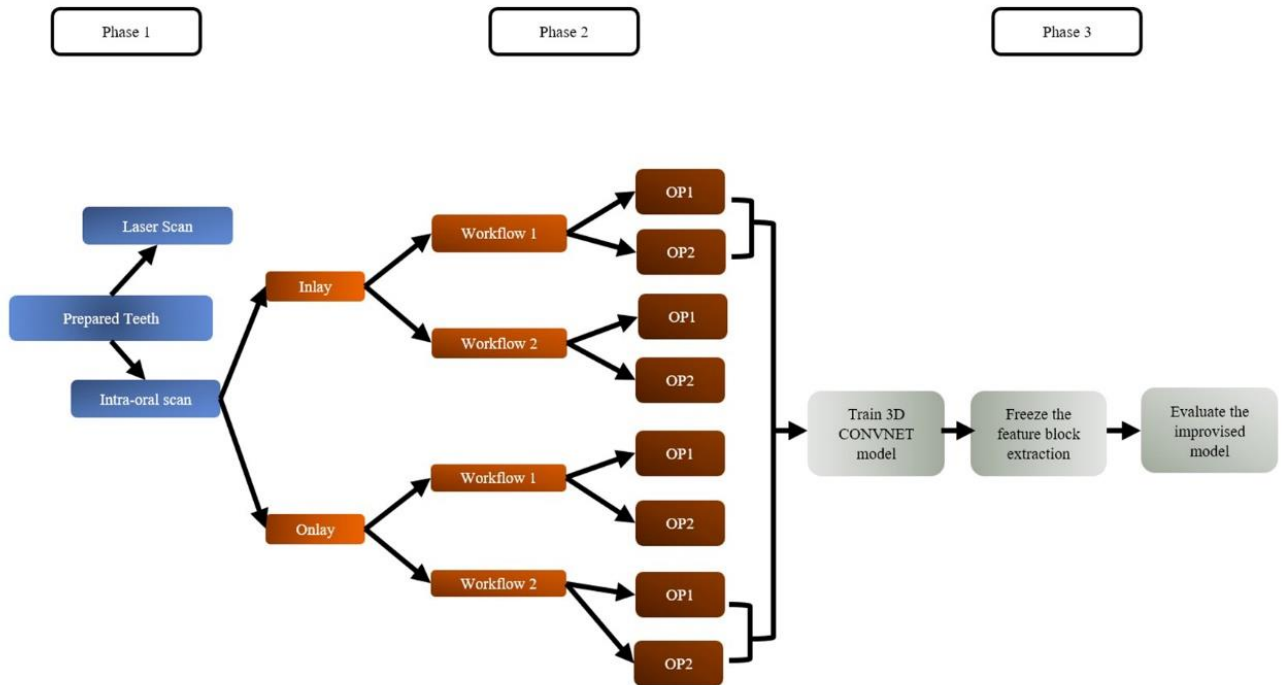

**Supplementary (S) Figure 2:** Flowchart summary of the study design. (OP1 = Operator 1, OP2 = Operator 2)

Laser Scanner (Inlay preparation)

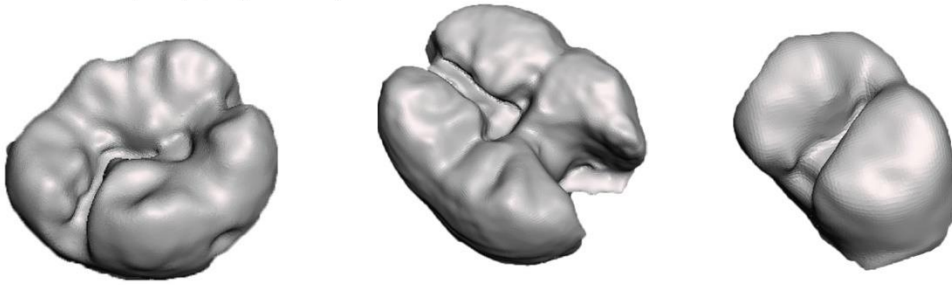

Intraoral Scanner (Inlay preparation)

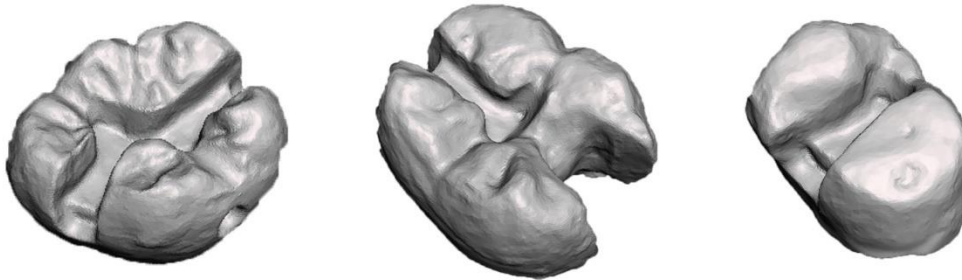

Laser Scanner (Onlay preparation)

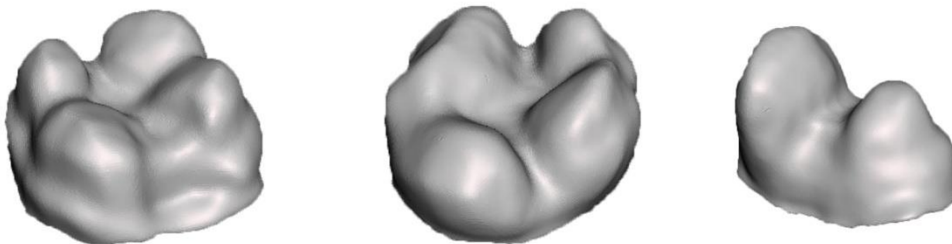

Intraoral Scanner (Onlay preparation)

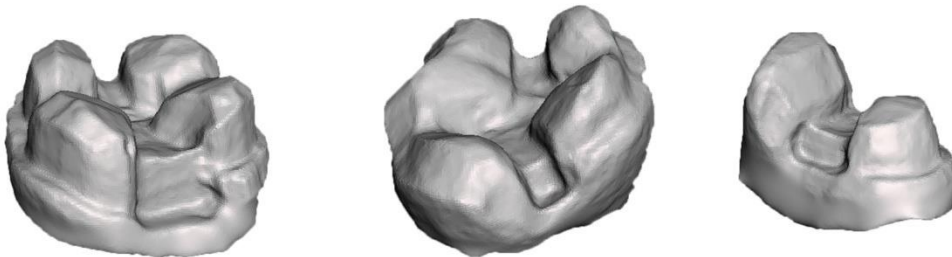

**Supplementary (S) Figure 3:** Comparison of 3D scan quality of tooth preparations for partial dental crowns.



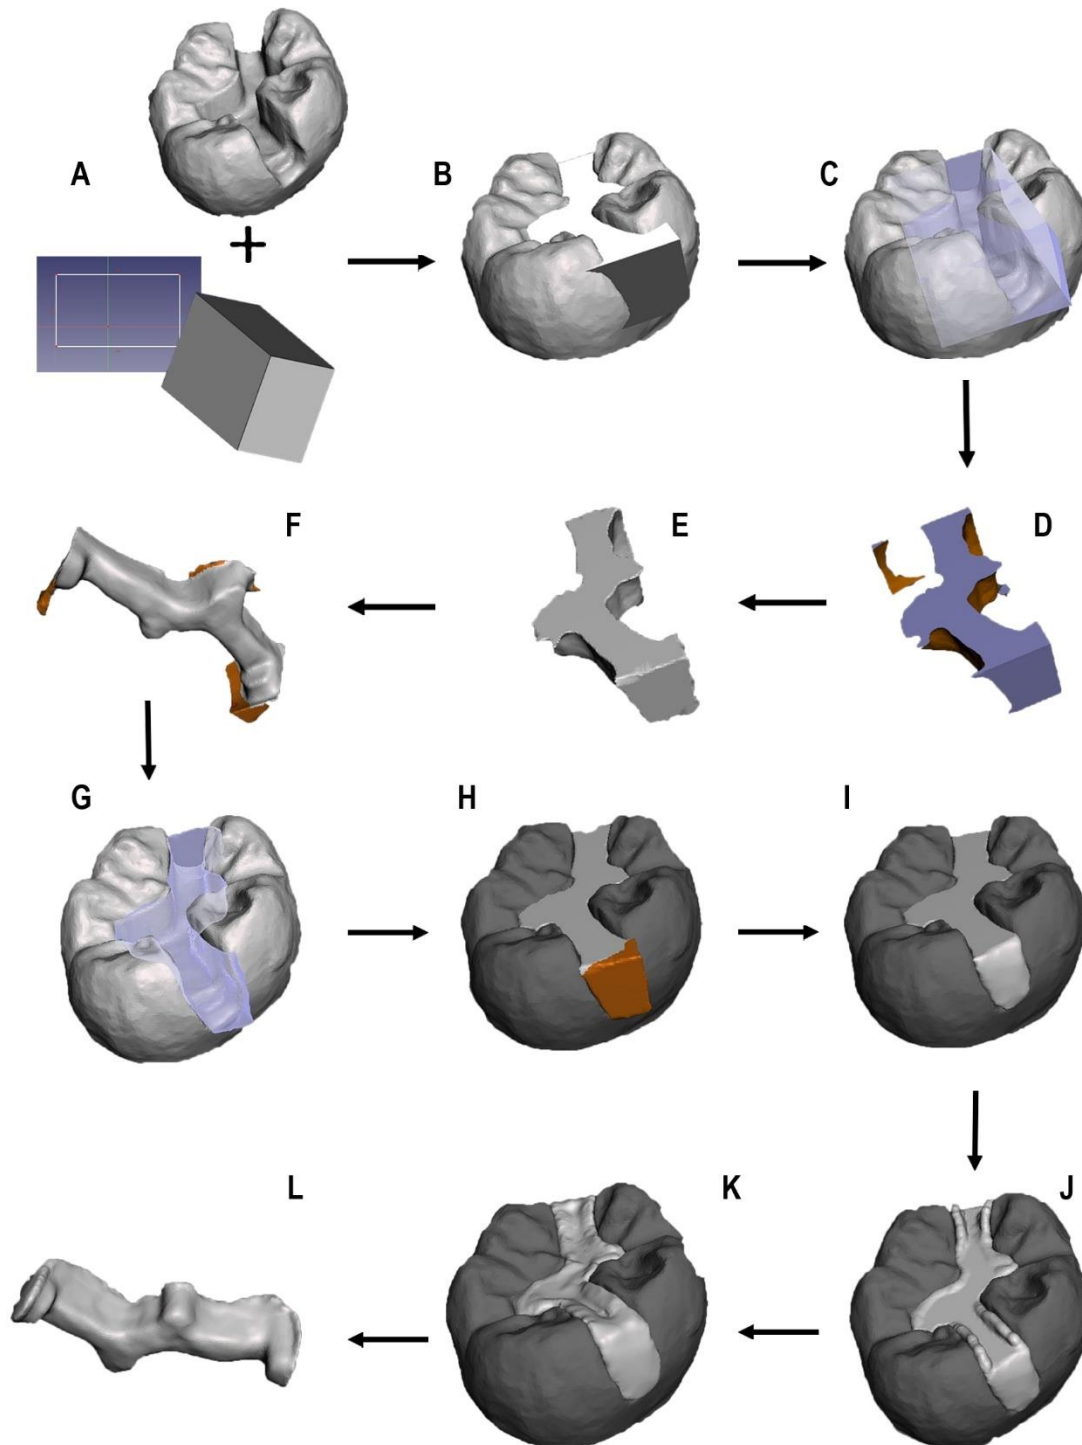

**Supplementary (S) Figure 4:** Workflow 2 for inlay design: A) create 3D block in CAD, B) load block into tooth preparation, C) ensure block occupies entire defect, D) perform Boolean difference, E) perform 'make solid' function, F) discard excess rough edge, G) ensure proper 3D seal and contact, H) reduce peripheral excess, I) sculpt tooth contour, J) inflate edges to create marginal ridge and cuspal contact, K) further draw, shrink and smooth inflation to contour the occlusal surface, L) finalize the design.

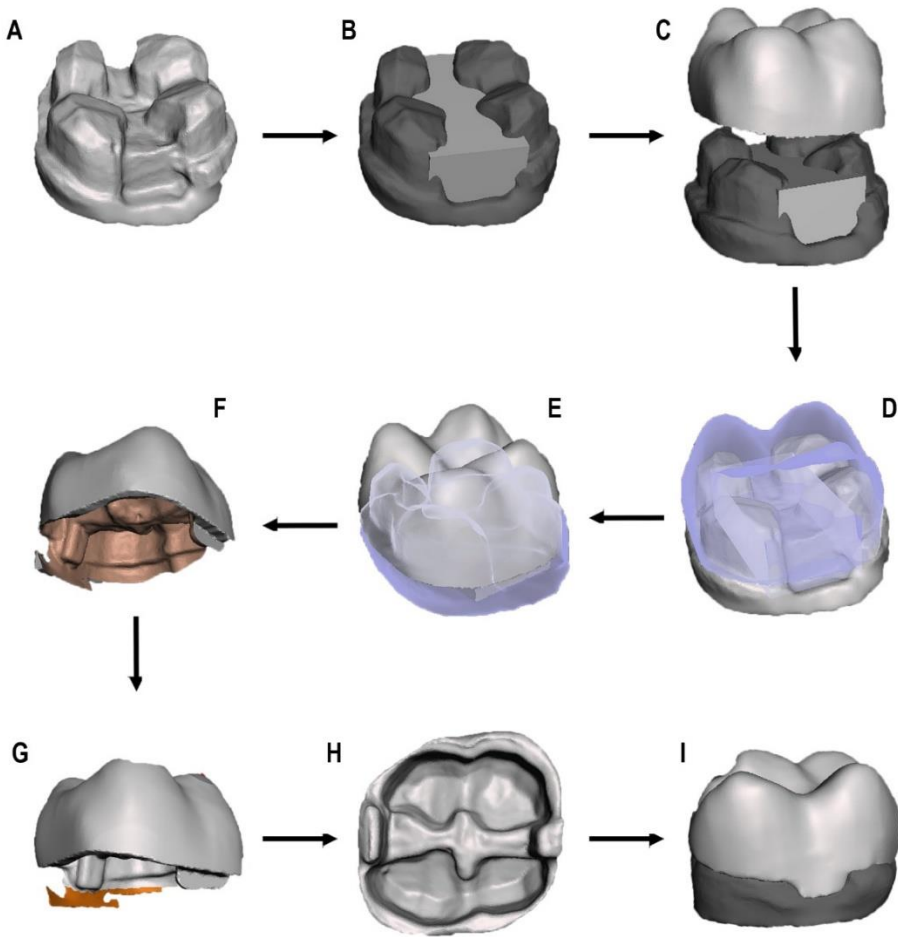

**Supplementary (S) Figure 5:** Workflow 2 for onlay design: A) import onlay preparation, B) superimpose block, C) place crown template over block and preparation model, D) combine block and crown template, E) perform 'make solid' on crown and block, F) perform Boolean difference between combined structure and tooth preparation, G) remove excess and autofix holes, H) sculpt, trim and smoothen the contour, I) finalize the design and check fit.

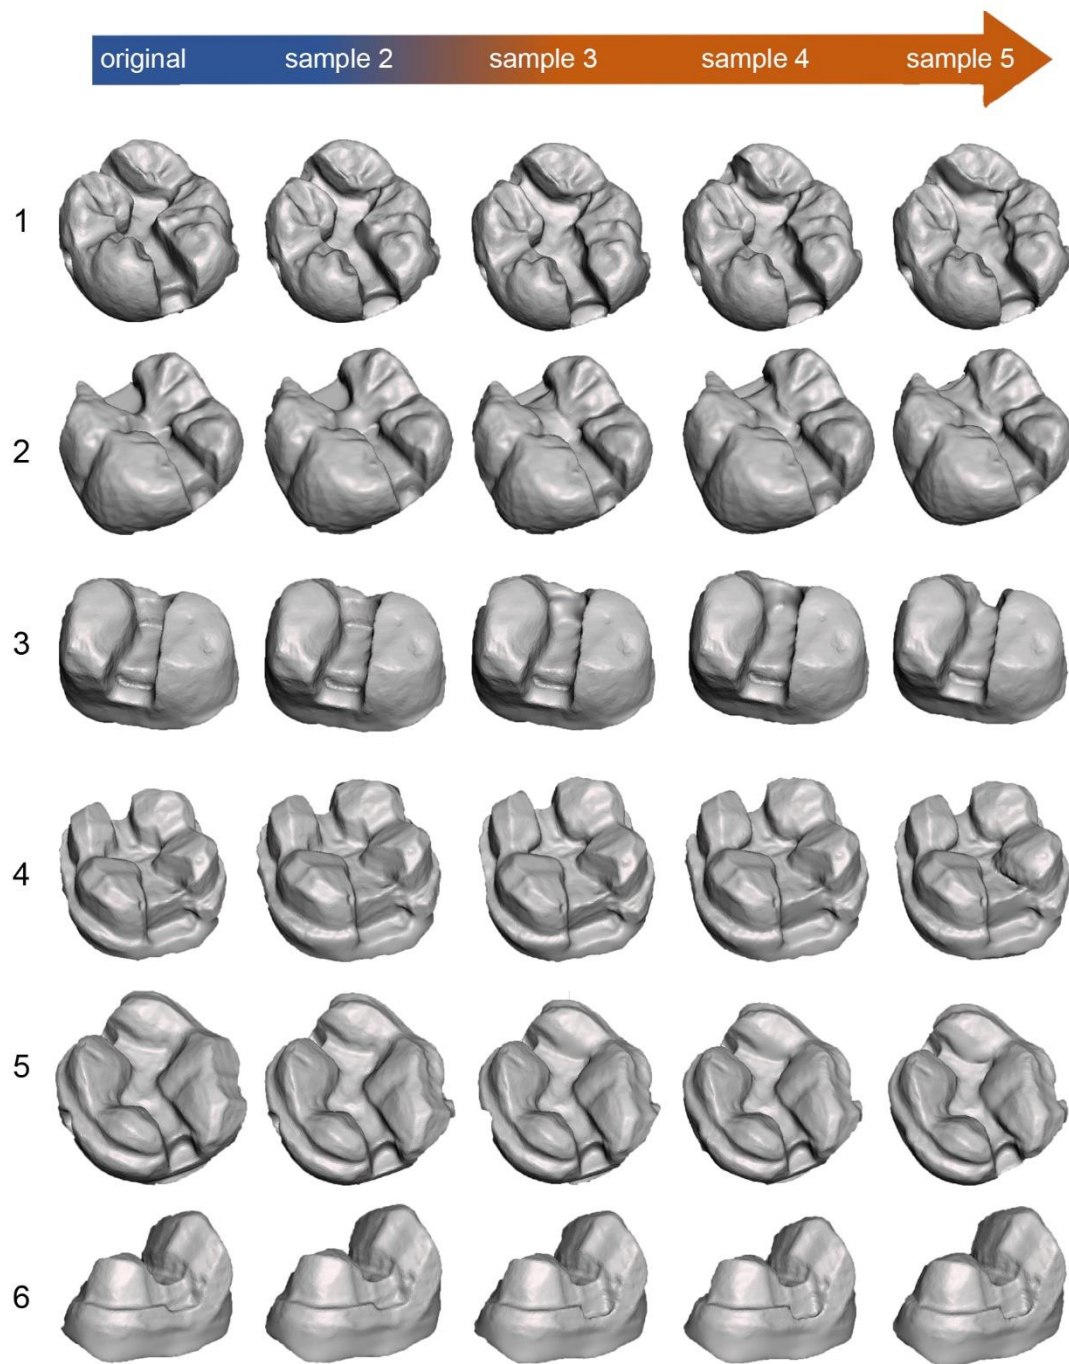

**Supplementary (S) Figure 6:** oversampling of existing 3D models of tooth preparation.

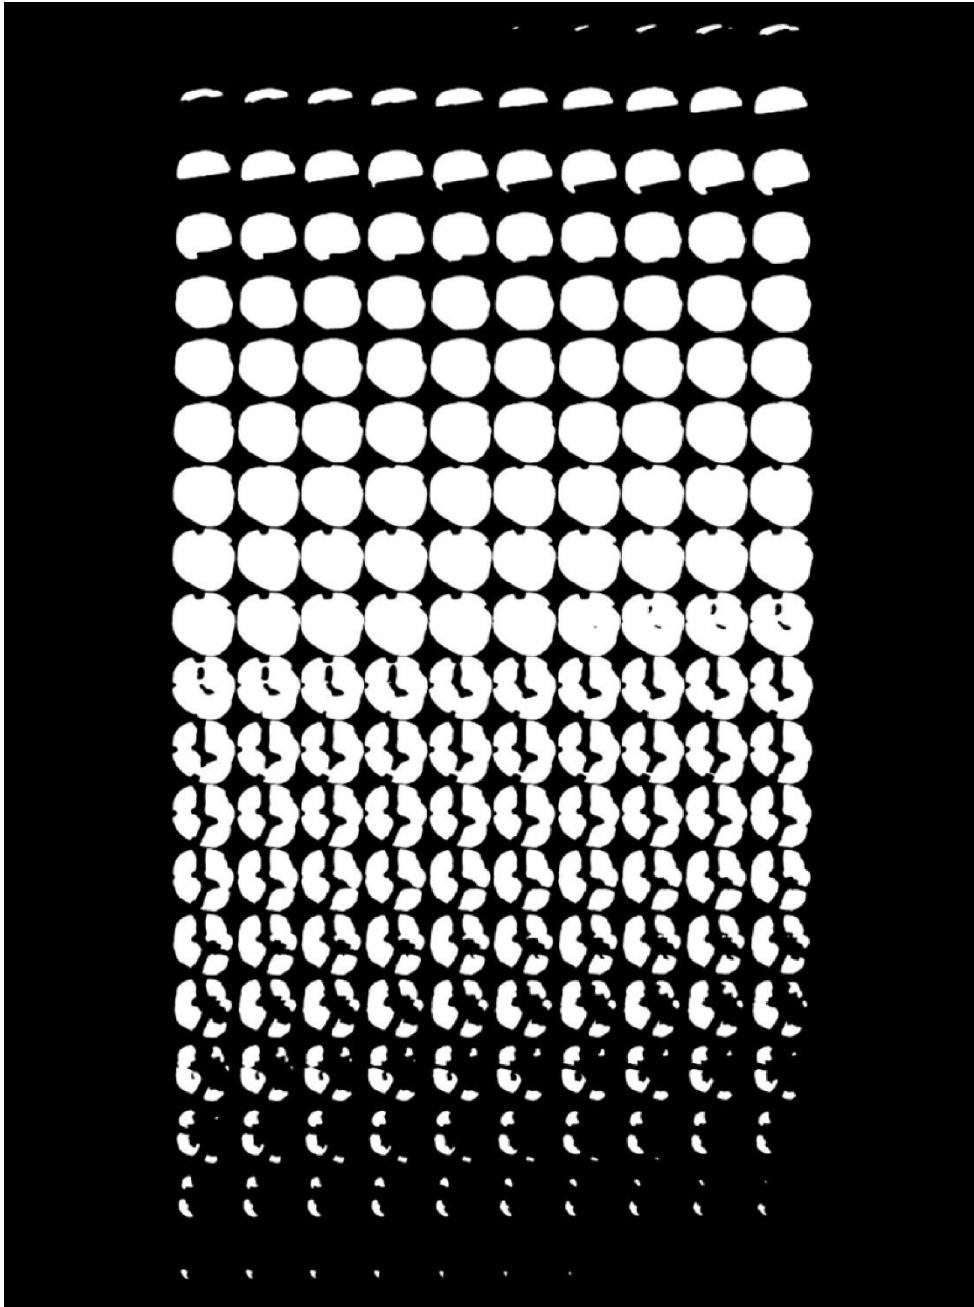

**Supplementary (S) Figure 7:** Stacked view of one 3D model of tooth preparation sliced into 2D segments.

## Supplementary Tables

**Supplementary Table 1:** Analysis of variance (n=116) for virtual volume

|                                                                                                                                                                                                                                                                                                                                                                                                                                 |                                             |                                             |
|---------------------------------------------------------------------------------------------------------------------------------------------------------------------------------------------------------------------------------------------------------------------------------------------------------------------------------------------------------------------------------------------------------------------------------|---------------------------------------------|---------------------------------------------|
| List of independent factors:                                                                                                                                                                                                                                                                                                                                                                                                    |                                             |                                             |
| <p><b>1. Type of Prosthesis:</b> <math>F(df) = 112.91 (1), P = &lt;.001</math></p> <p style="text-align: right;">Inlay = Mean <math>\pm</math>SD = 36.85 <math>\pm</math>11.93<br/>Onlay = Mean <math>\pm</math>SD = 165.38 <math>\pm</math>87.41</p>                                                                                                                                                                           |                                             |                                             |
| <p><b>2. Virtual Workflow:</b> <math>F(df) = 0.001 (1), P = .973</math></p> <p style="text-align: right;">Workflow 1 (3matics) = Mean <math>\pm</math>SD = 103.06 <math>\pm</math>89.75<br/>Workflow 2 (Meshmixer) = Mean <math>\pm</math>SD = 103.60 <math>\pm</math>91.58</p>                                                                                                                                                 |                                             |                                             |
| <p><b>3. Clinical Operator:</b> <math>F(df) &lt;.001 (1), P = .984</math></p> <p style="text-align: right;">Operator 1 = Mean <math>\pm</math>SD = 103.21 <math>\pm</math>90.90<br/>Operator 2 = Mean <math>\pm</math>SD = 103.45 <math>\pm</math>90.43</p>                                                                                                                                                                     |                                             |                                             |
| <b>Inlay</b>                                                                                                                                                                                                                                                                                                                                                                                                                    |                                             |                                             |
|                                                                                                                                                                                                                                                                                                                                                                                                                                 | <b>Operator 1 (Mean <math>\pm</math>SD)</b> | <b>Operator 2 (Mean <math>\pm</math>SD)</b> |
| <b>Workflow 1</b>                                                                                                                                                                                                                                                                                                                                                                                                               | 38.20 $\pm$ 12.78                           | 39.16 $\pm$ 12.75                           |
| <b>Workflow 2</b>                                                                                                                                                                                                                                                                                                                                                                                                               | 35.47 $\pm$ 11.41                           | 34.56 $\pm$ 11.41                           |
| <b>Onlay</b>                                                                                                                                                                                                                                                                                                                                                                                                                    |                                             |                                             |
|                                                                                                                                                                                                                                                                                                                                                                                                                                 | <b>Operator 1 (Mean <math>\pm</math>SD)</b> | <b>Operator 2 (Mean <math>\pm</math>SD)</b> |
| <b>Workflow 1</b>                                                                                                                                                                                                                                                                                                                                                                                                               | 160.32 $\pm$ 92.52                          | 165.96 $\pm$ 88.84                          |
| <b>Workflow 2</b>                                                                                                                                                                                                                                                                                                                                                                                                               | 169.99 $\pm$ 87.90                          | 165.26 $\pm$ 89.29                          |
| <b>Interaction effect</b>                                                                                                                                                                                                                                                                                                                                                                                                       |                                             |                                             |
| <p><b>1.</b> Type of Prosthesis vs. Virtual Workflow: <math>F(df) = 0.113 (1), P = .737</math></p> <p><b>2.</b> Type of Prosthesis vs. Clinical Operator: <math>F(df) &lt;.001 (1), P = .986</math></p> <p><b>3.</b> Virtual Workflow vs. Clinical Operator: <math>F(df) = 0.064 (1), P = .801</math></p> <p><b>4.</b> Type of Prosthesis vs Virtual Workflow vs Clinical Operator: <math>F(df) = 0.031(1), P = .861</math></p> |                                             |                                             |

**Supplementary Table 2:** Analysis of variance (n=116) for Hausdorff's Distance (in mm)

|                                                                                                                                                                                                                                                                                                                                                                                                                                  |                                             |                                             |
|----------------------------------------------------------------------------------------------------------------------------------------------------------------------------------------------------------------------------------------------------------------------------------------------------------------------------------------------------------------------------------------------------------------------------------|---------------------------------------------|---------------------------------------------|
| List of independent factors:                                                                                                                                                                                                                                                                                                                                                                                                     |                                             |                                             |
| <p><b>1. Type of Prosthesis:</b> <math>F(df) = 1.81 (1), P = .181</math></p> <p style="text-align: right;">Inlay = Mean <math>\pm</math>SD = <math>0.23 \pm 0.11</math><br/>Onlay = Mean <math>\pm</math>SD = <math>0.21 \pm 0.12</math></p>                                                                                                                                                                                     |                                             |                                             |
| <p><b>2. Virtual Workflow:</b> <math>F(df) = 15.62 (1), P &lt; .001</math></p> <p style="text-align: right;">Workflow 1 (3matics) = Mean <math>\pm</math>SD = <math>0.25 \pm 0.08</math><br/>Workflow 2 (Meshmixer) = Mean <math>\pm</math>SD = <math>0.19 \pm 0.14</math></p>                                                                                                                                                   |                                             |                                             |
| <p><b>3. Clinical Operator:</b> <math>F(df) = 37.27 (1), P &lt; .001</math></p> <p style="text-align: right;">Operator 1 = Mean <math>\pm</math>SD = <math>0.17 \pm 0.12</math><br/>Operator 2 = Mean <math>\pm</math>SD = <math>0.27 \pm 0.09</math></p>                                                                                                                                                                        |                                             |                                             |
| <b>Inlay</b>                                                                                                                                                                                                                                                                                                                                                                                                                     |                                             |                                             |
|                                                                                                                                                                                                                                                                                                                                                                                                                                  | <b>Operator 1 (Mean <math>\pm</math>SD)</b> | <b>Operator 2 (Mean <math>\pm</math>SD)</b> |
| <b>Workflow 1</b>                                                                                                                                                                                                                                                                                                                                                                                                                | 0.24 $\pm$ 0.09                             | 0.23 $\pm$ 0.08                             |
| <b>Workflow 2</b>                                                                                                                                                                                                                                                                                                                                                                                                                | 0.15 $\pm$ 0.12                             | 0.30 $\pm$ 0.09                             |
| <b>Onlay</b>                                                                                                                                                                                                                                                                                                                                                                                                                     |                                             |                                             |
|                                                                                                                                                                                                                                                                                                                                                                                                                                  | <b>Operator 1 (Mean <math>\pm</math>SD)</b> | <b>Operator 2 (Mean <math>\pm</math>SD)</b> |
| <b>Workflow 1</b>                                                                                                                                                                                                                                                                                                                                                                                                                | 0.26 $\pm$ 0.07                             | 0.27 $\pm$ 0.07                             |
| <b>Workflow 2</b>                                                                                                                                                                                                                                                                                                                                                                                                                | 0.04 $\pm$ 0.05                             | 0.27 $\pm$ 0.10                             |
| <b>Interaction effect</b>                                                                                                                                                                                                                                                                                                                                                                                                        |                                             |                                             |
| <p><b>1.</b> Type of Prosthesis vs. Virtual Workflow: <math>F(df) = 10.38 (1), P = .002</math></p> <p><b>2.</b> Type of Prosthesis vs. Clinical Operator: <math>F(df) = 2.30 (1), P = .132</math></p> <p><b>3.</b> Virtual Workflow vs. Clinical Operator: <math>F(df) = 34.90 (1), P &lt; .001</math></p> <p><b>4.</b> Type of Prosthesis vs Virtual Workflow vs Clinical Operator: <math>F(df) = 0.995(1), P = .321</math></p> |                                             |                                             |

**Supplementary Table 3:** Analysis of variance (n=116) for Dice Similarity Coefficient

|                                                                                                                                                                                                                                                                                                                                                                                                                                 |                                             |                                             |
|---------------------------------------------------------------------------------------------------------------------------------------------------------------------------------------------------------------------------------------------------------------------------------------------------------------------------------------------------------------------------------------------------------------------------------|---------------------------------------------|---------------------------------------------|
| List of independent factors:                                                                                                                                                                                                                                                                                                                                                                                                    |                                             |                                             |
| <p><b>1. Type of Prosthesis:</b> <math>F(df) = 1.34 (1), P = .250</math></p> <p style="text-align: right;">Inlay = Mean <math>\pm</math>SD = <math>0.87 \pm 0.04</math><br/>Onlay = Mean <math>\pm</math>SD = <math>0.88 \pm 0.06</math></p>                                                                                                                                                                                    |                                             |                                             |
| <p><b>2. Virtual Workflow:</b> <math>F(df) = 20.95 (1), P &lt; .001</math></p> <p style="text-align: right;">Workflow 1 (3matics) = Mean <math>\pm</math>SD = <math>0.86 \pm 0.04</math><br/>Workflow 2 (Meshmixer) = Mean <math>\pm</math>SD = <math>0.89 \pm 0.06</math></p>                                                                                                                                                  |                                             |                                             |
| <p><b>3. Clinical Operator:</b> <math>F(df) = 45.95 (1), P &lt; .001</math></p> <p style="text-align: right;">Operator 1 = Mean <math>\pm</math>SD = <math>0.90 \pm 0.05</math><br/>Operator 2 = Mean <math>\pm</math>SD = <math>0.85 \pm 0.03</math></p>                                                                                                                                                                       |                                             |                                             |
| <b>Inlay</b>                                                                                                                                                                                                                                                                                                                                                                                                                    |                                             |                                             |
|                                                                                                                                                                                                                                                                                                                                                                                                                                 | <b>Operator 1 (Mean <math>\pm</math>SD)</b> | <b>Operator 2 (Mean <math>\pm</math>SD)</b> |
| <b>Workflow 1</b>                                                                                                                                                                                                                                                                                                                                                                                                               | $0.86 \pm 0.04$                             | $0.87 \pm 0.03$                             |
| <b>Workflow 2</b>                                                                                                                                                                                                                                                                                                                                                                                                               | $0.91 \pm 0.05$                             | $0.85 \pm 0.04$                             |
| <b>Onlay</b>                                                                                                                                                                                                                                                                                                                                                                                                                    |                                             |                                             |
|                                                                                                                                                                                                                                                                                                                                                                                                                                 | <b>Operator 1 (Mean <math>\pm</math>SD)</b> | <b>Operator 2 (Mean <math>\pm</math>SD)</b> |
| <b>Workflow 1</b>                                                                                                                                                                                                                                                                                                                                                                                                               | $0.87 \pm 0.05$                             | $0.84 \pm 0.03$                             |
| <b>Workflow 2</b>                                                                                                                                                                                                                                                                                                                                                                                                               | $0.95 \pm 0.01$                             | $0.85 \pm 0.04$                             |
| <b>Interaction effect</b>                                                                                                                                                                                                                                                                                                                                                                                                       |                                             |                                             |
| <p><b>1.</b> Type of Prosthesis vs. Virtual Workflow: <math>F(df) = 6.21 (1), P = .014</math></p> <p><b>2.</b> Type of Prosthesis vs. Clinical Operator: <math>F(df) = 5.81 (1), P = .018</math></p> <p><b>3.</b> Virtual Workflow vs. Clinical Operator: <math>F(df) = 29.78 (1), P &lt; .001</math></p> <p><b>4.</b> Type of Prosthesis vs Virtual Workflow vs Clinical Operator: <math>F(df) = .393 (1), P = .532</math></p> |                                             |                                             |
